# Supplementary material for: Introduction of a new and safe synthesis procedure for Ni-MOF-I in aqueous solution and its application for the extraction of some pesticides from different beverages
Source: Royal Society of Chemistry journal article supplement (doi:10.1039/d3ra03441k), 2023-01-01
Supplement: d3ra03441k1.pdf [file d3ra03441k1.pdf]

## Supplementary materials

### **Introduction of a new and safe synthesis procedure for Ni-MOF-I in aqueous solution and its application for the extraction of some pesticides from different beverages**

Mir Ali Farajzadeh \*, <sup>a, b</sup>, Nastaran Khoshnavaz <sup>a</sup>, Sakha Pezhhanfar <sup>a</sup>, Mohammad Reza Afshar Mogaddam <sup>c, d</sup>

<sup>a</sup> Department of Analytical Chemistry, Faculty of Chemistry, University of Tabriz, Tabriz, Iran

<sup>b</sup> Engineering Faculty, Near East University, 99138 Nicosia, North Cyprus, Mersin 10, Turkey

<sup>c</sup> Food and Drug Safety Research Center, Tabriz University of Medical Sciences, Tabriz, Iran

<sup>d</sup> Pharmaceutical Analysis Research Center, Tabriz University of Medical Sciences, Tabriz, Iran

\*Corresponding author: M.A. Farajzadeh

Tel.: +98 41 33393084

Fax: +98 41 33340191

E-mail address: mafarajzadeh@yahoo.com; mafarajzadeh@tabrizu.ac.ir

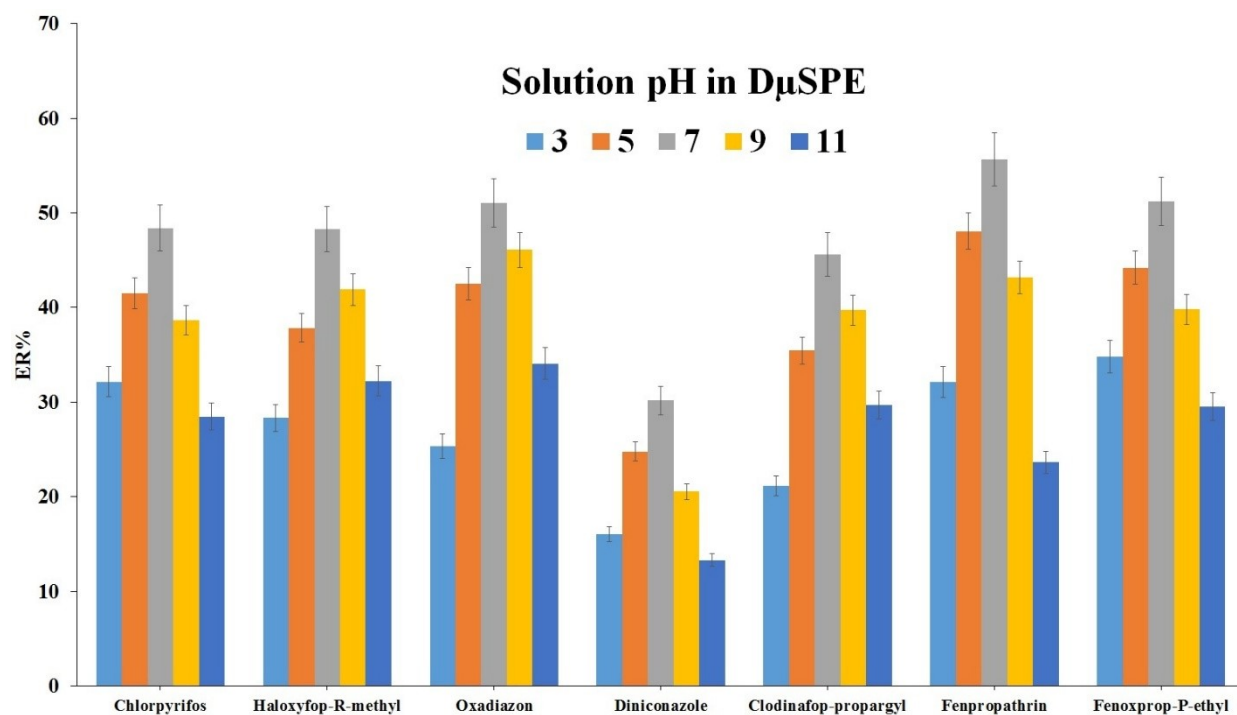

Fig. S1. Study of pH in DμSPE.

Extraction conditions: DμSPE procedure: aqueous solution, 5 mL deionized water containing 1.5 mol L<sup>-1</sup> Na<sub>2</sub>SO<sub>4</sub> spiked with 150 μg L<sup>-1</sup> of each analyte without pH adjustment; vortex time in adsorption step, 5 min; desorption solvent (volume), ACN (1.0 mL); vortex time in desorption step, 5 min; and centrifugation speed and time, 6000 rpm and 5 min, respectively. DLLME procedure: aqueous phase, 5 mL deionized water without pH adjustment and salt addition; extraction solvent (volume), 1,2-DBE (28 μL); centrifugation rate, 6000 rpm; and centrifugation time, 5 min. The error bars show the minimum and maximum of three repeated determinations.

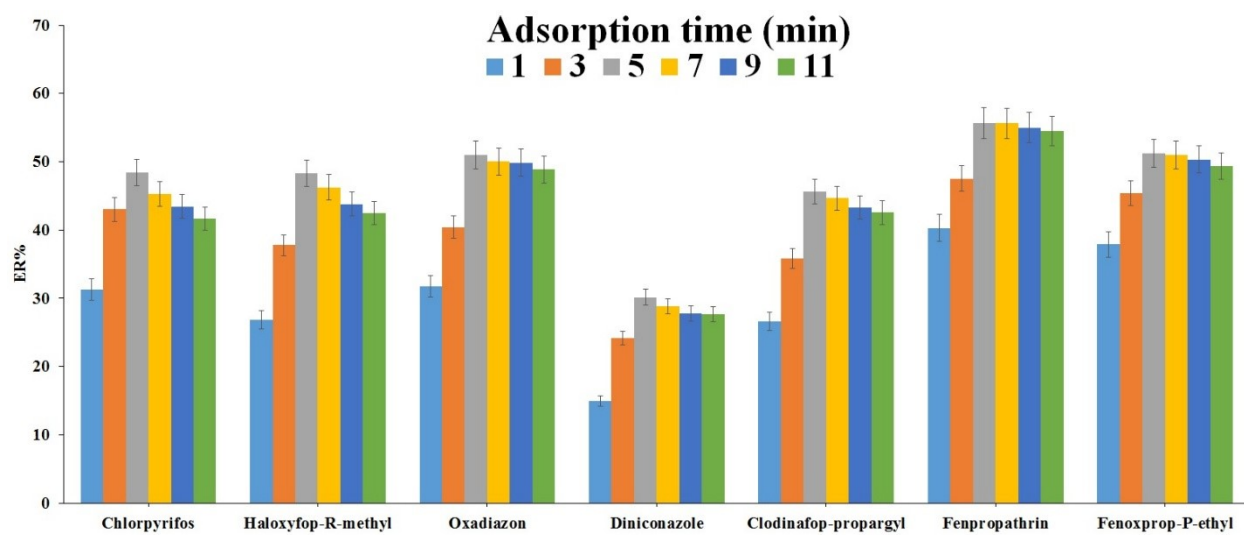

Fig. S2. Study of adsorption time.

Extraction conditions: are the same as those used in Fig. S1, without pH adjustment.

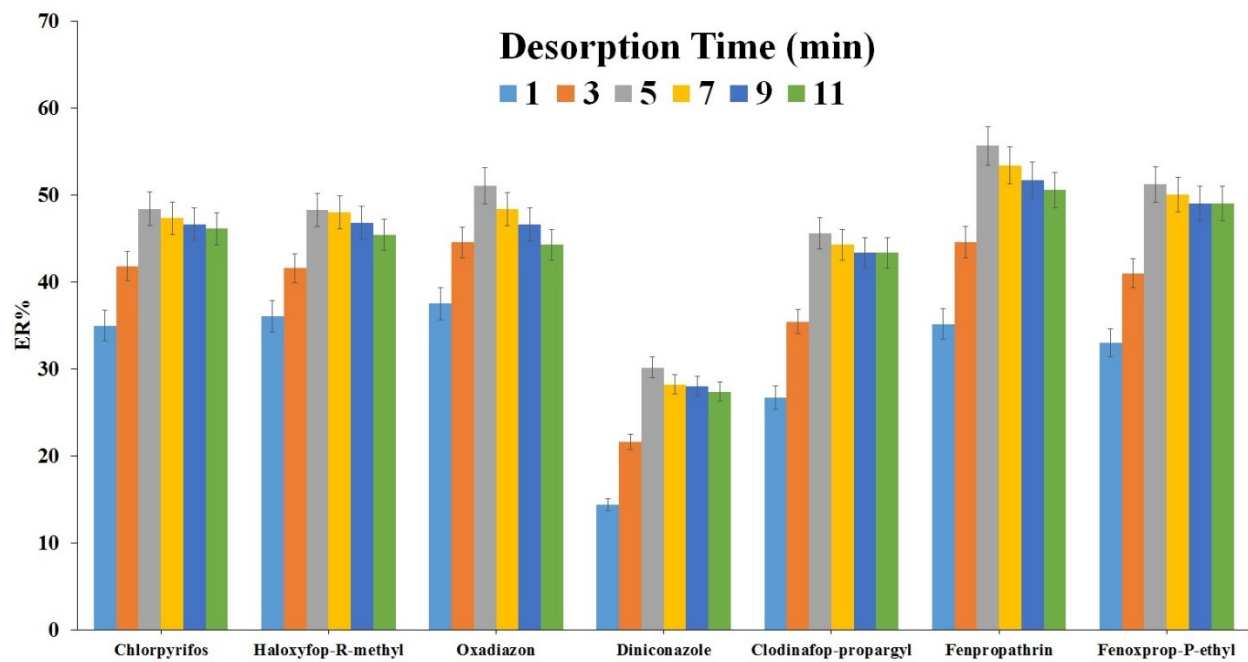

Fig. S3. Study of desorption time.

Extraction conditions: are the same as those used in Fig. S2, except 5 min was used as the adsorption time.

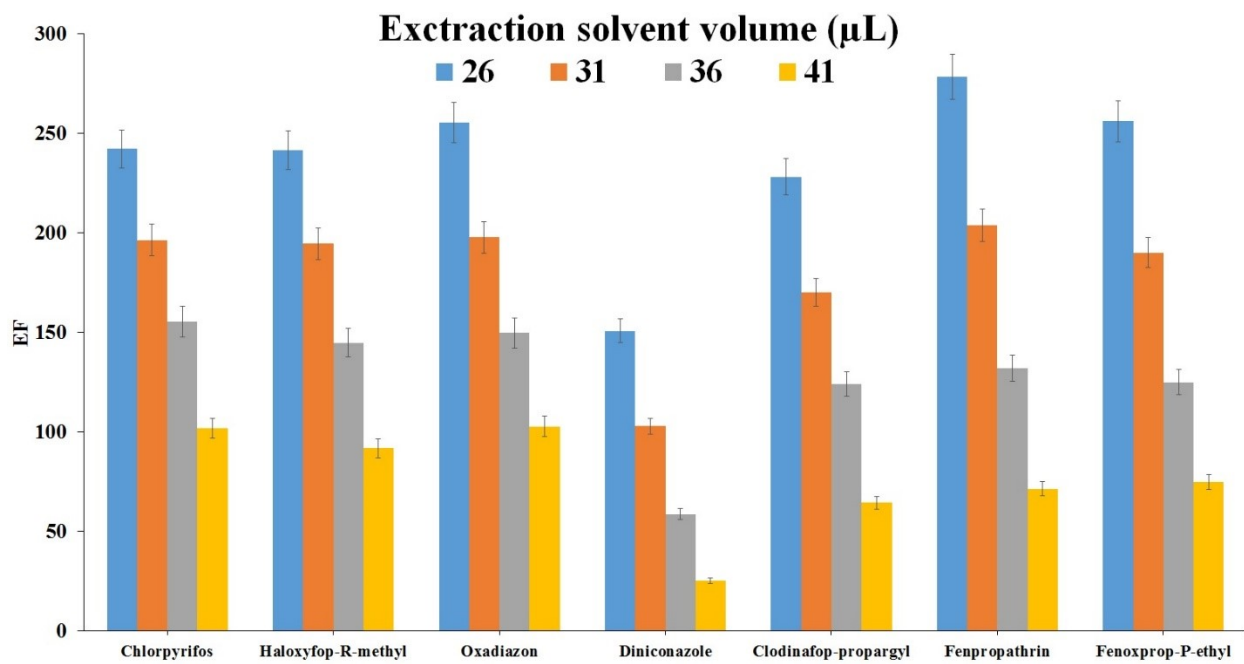

Fig. S4. Study of extraction solvent volume.

Extraction conditions: are the same as those used in Fig. S3, except 1,2-DBE and 5 min were used as the extraction solvent and desorption time, respectively.

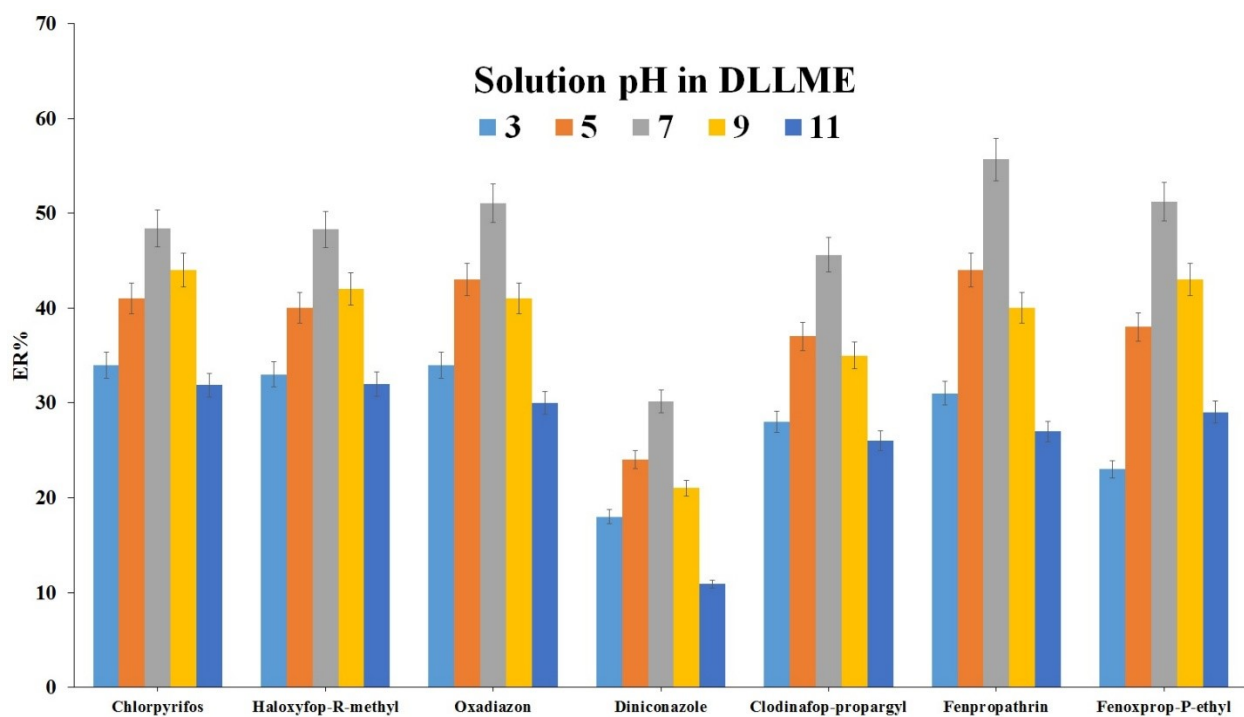

Fig. S5. Study of pH in DLLME.

Extraction conditions: are the same as those used in Fig. S4, except 26  $\mu$ L 1,2-DBE was used as the extraction solvent.

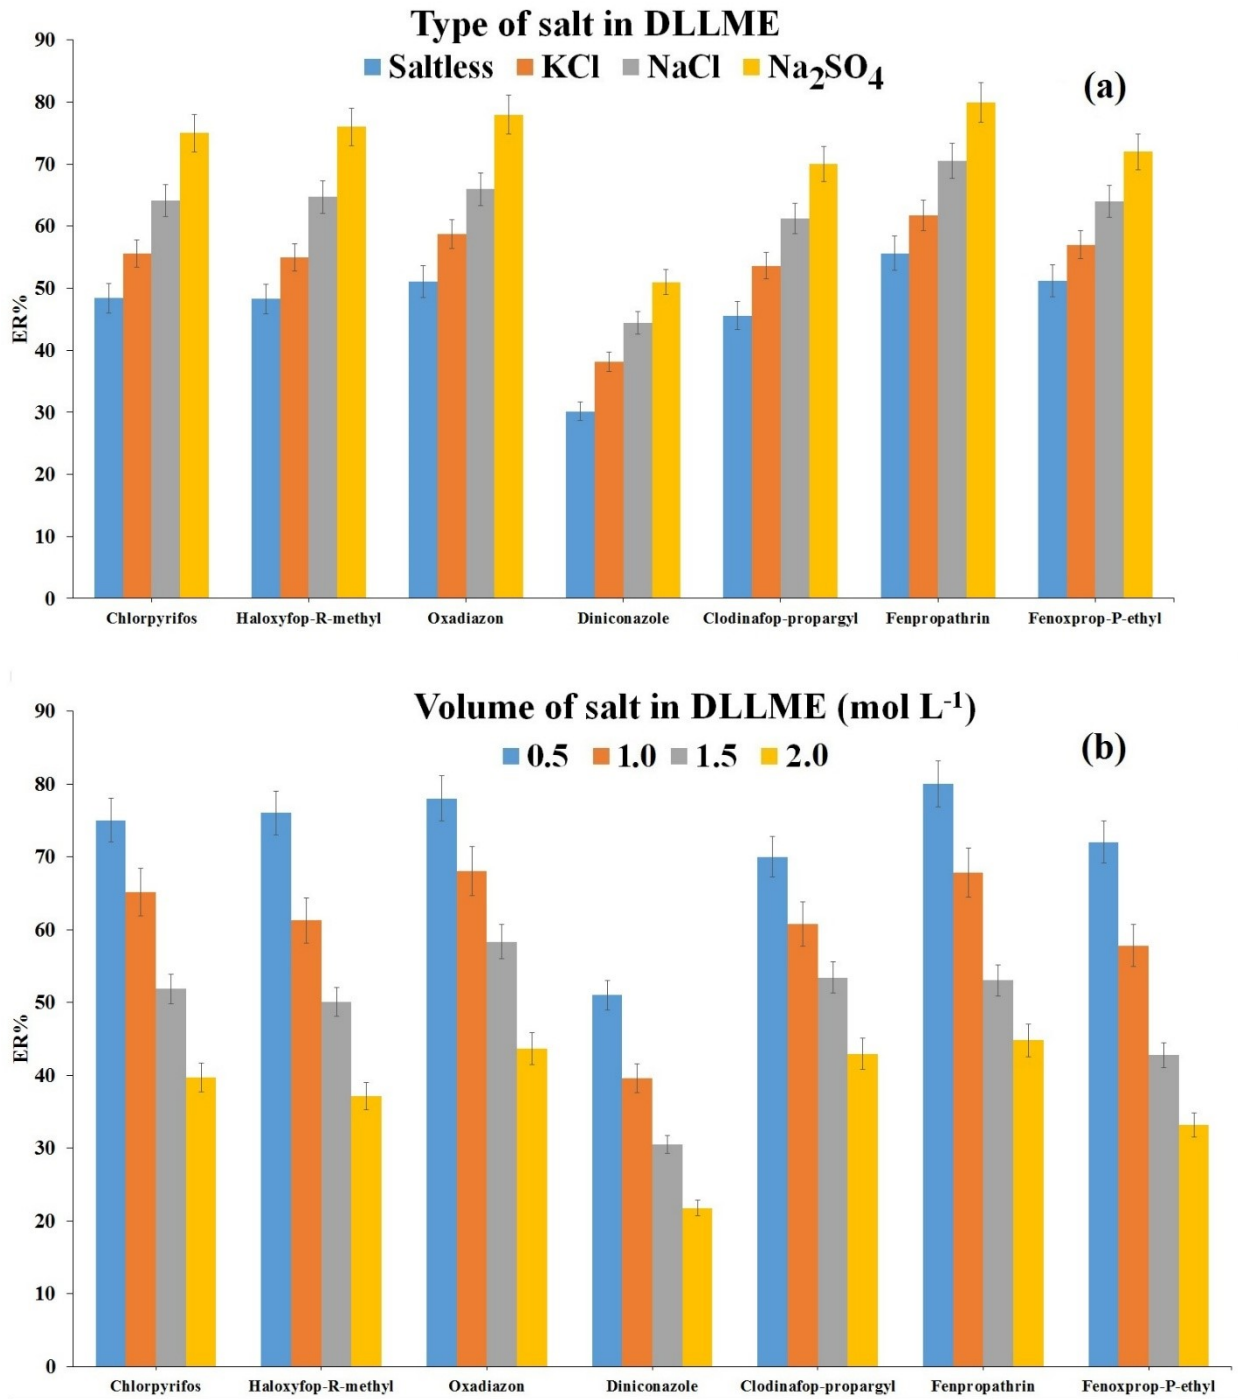

Fig. S6. impact of ionic strength in DLLME

Extraction conditions: are the same as those used in Fig. S5, except pH adjustment was not done in DLLME.
